# Supplementary material for: Insights into ZmWAKL in maize kernel development: genome-wide investigation and GA-mediated transcription
Source: PubMed Central journal article supplement (PMC10712088; doi:10.1186/s12864-023-09849-6), 2023-12-11
Supplement: 12864_2023_9849_MOESM2_ESM.pdf [file 12864_2023_9849_MOESM2_ESM.pdf]

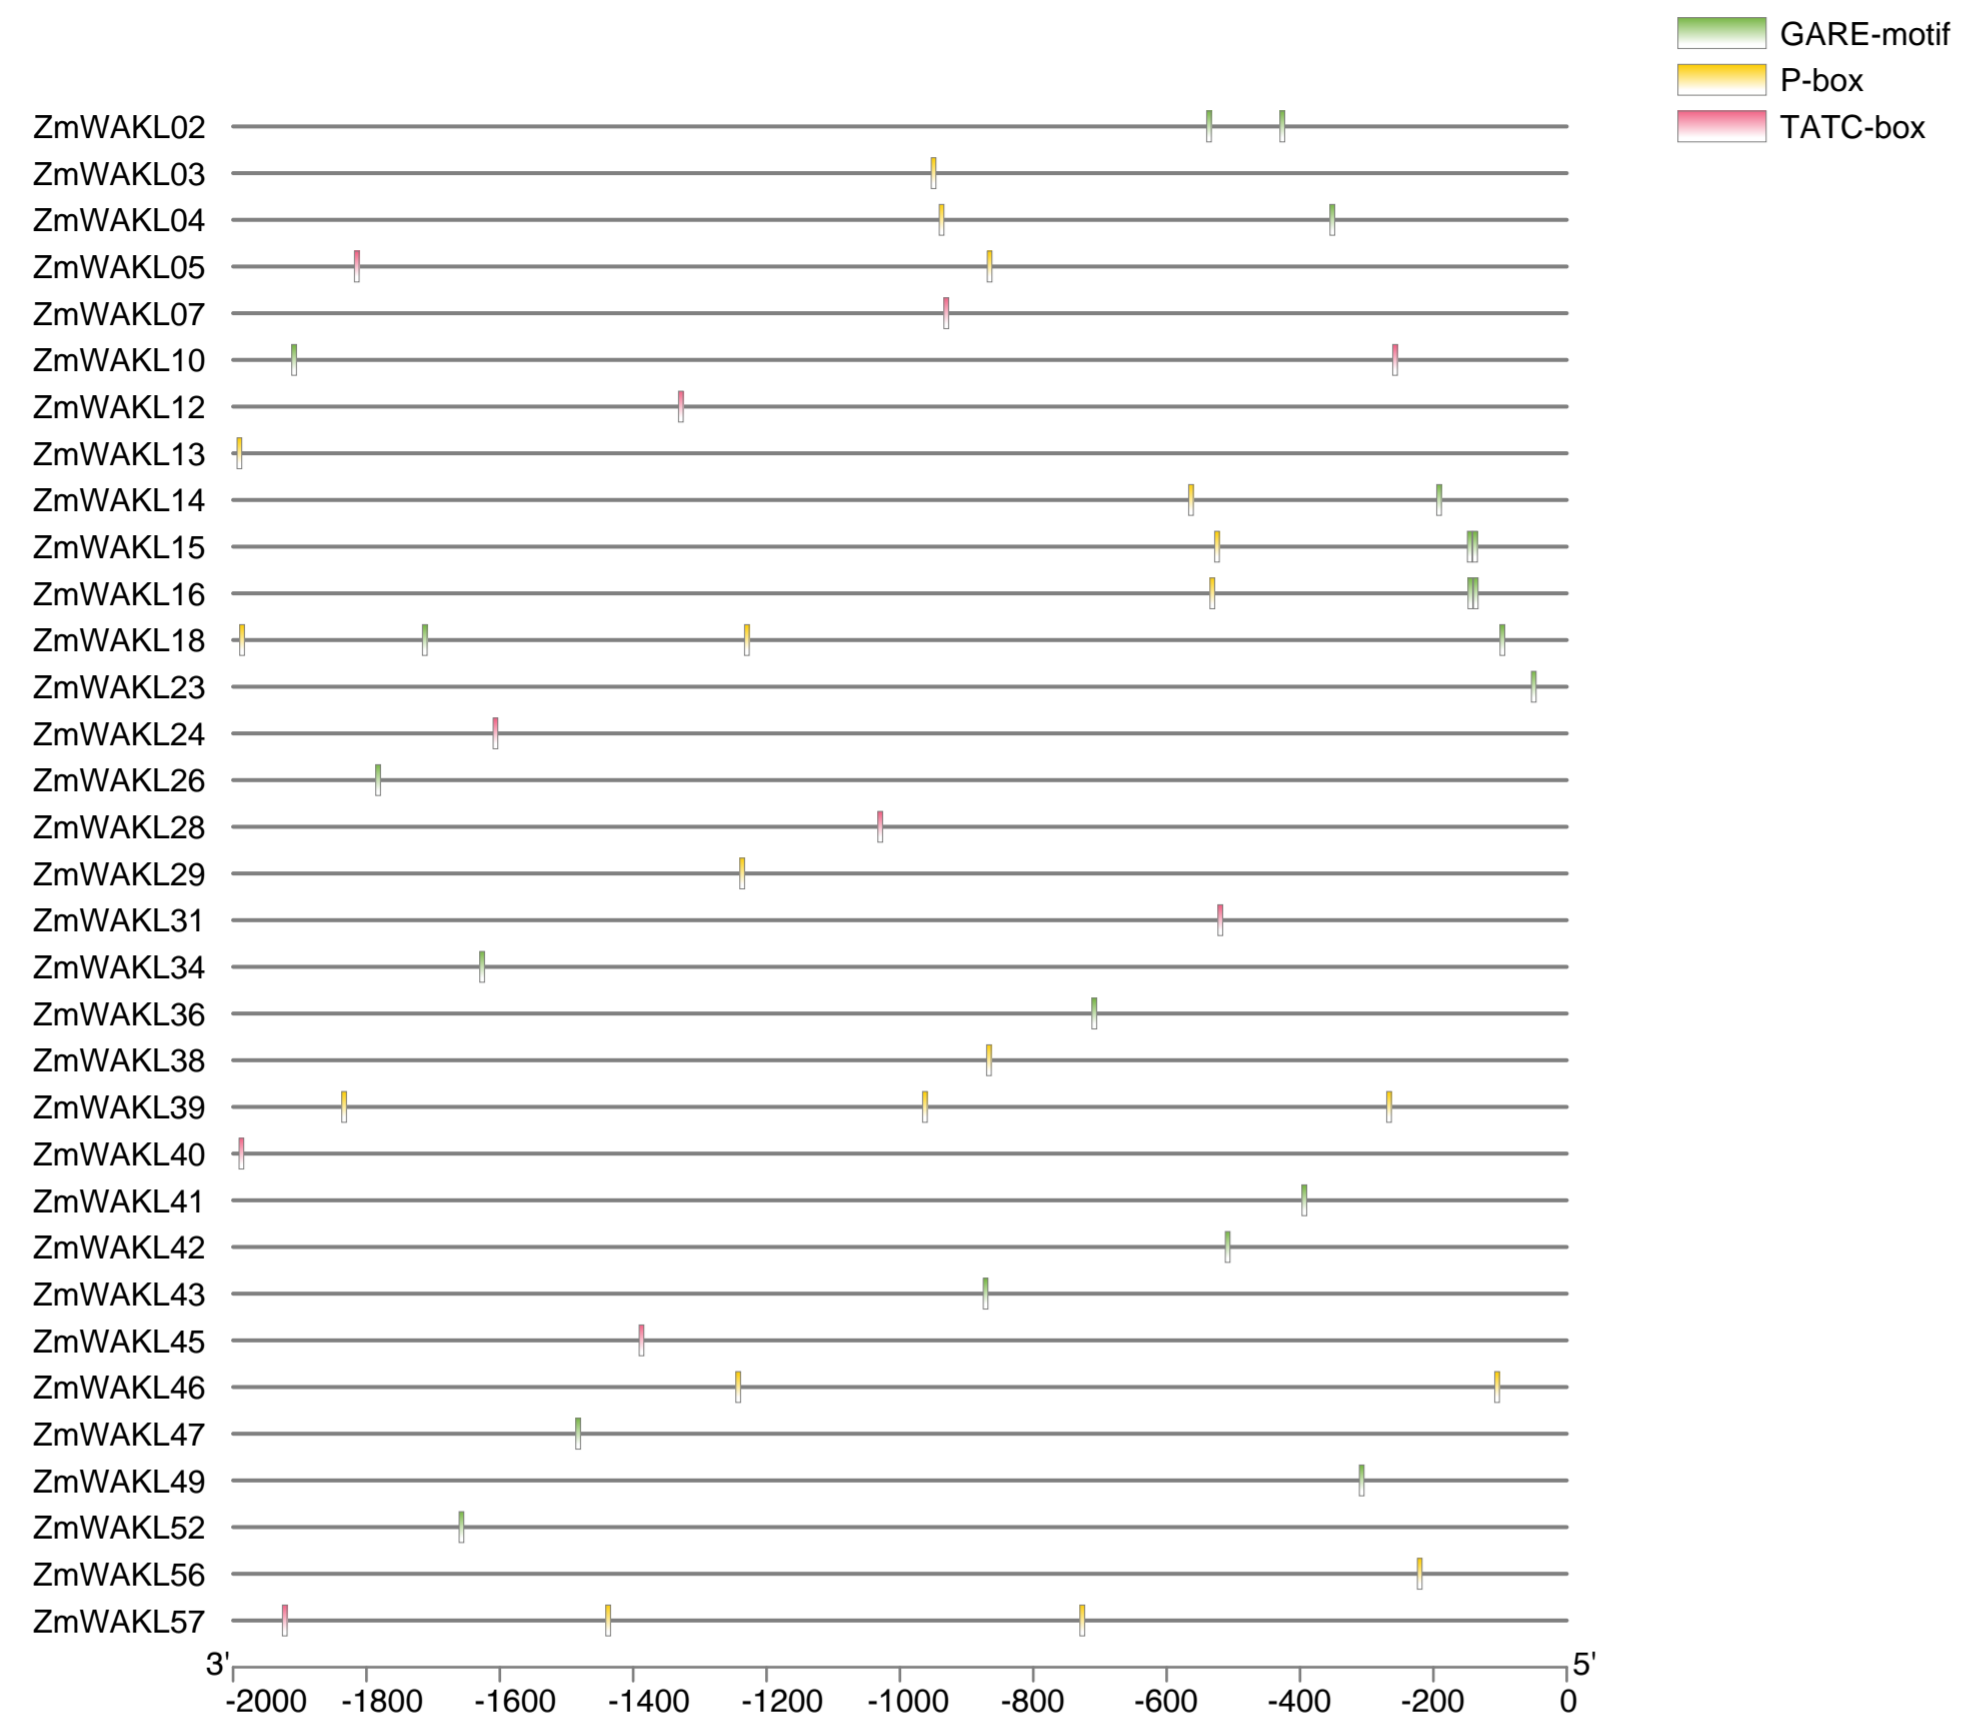

Fig.S2 Prediction of GA responsive related *cis*-acting elements in 33 *ZmWAKL* promoters. Promoter sequences (-2000 bp) of 33 *ZmWAKL* genes are analyzed by PlantCARE. The upstream length to the translation starts site can be inferred according to the scale at the bottom.
