# Supplementary material for: Insights into ZmWAKL in maize kernel development: genome-wide investigation and GA-mediated transcription
Source: PubMed Central journal article supplement (PMC10712088; doi:10.1186/s12864-023-09849-6), 2023-12-11
Supplement: 12864_2023_9849_MOESM3_ESM.pdf [file 12864_2023_9849_MOESM3_ESM.pdf]

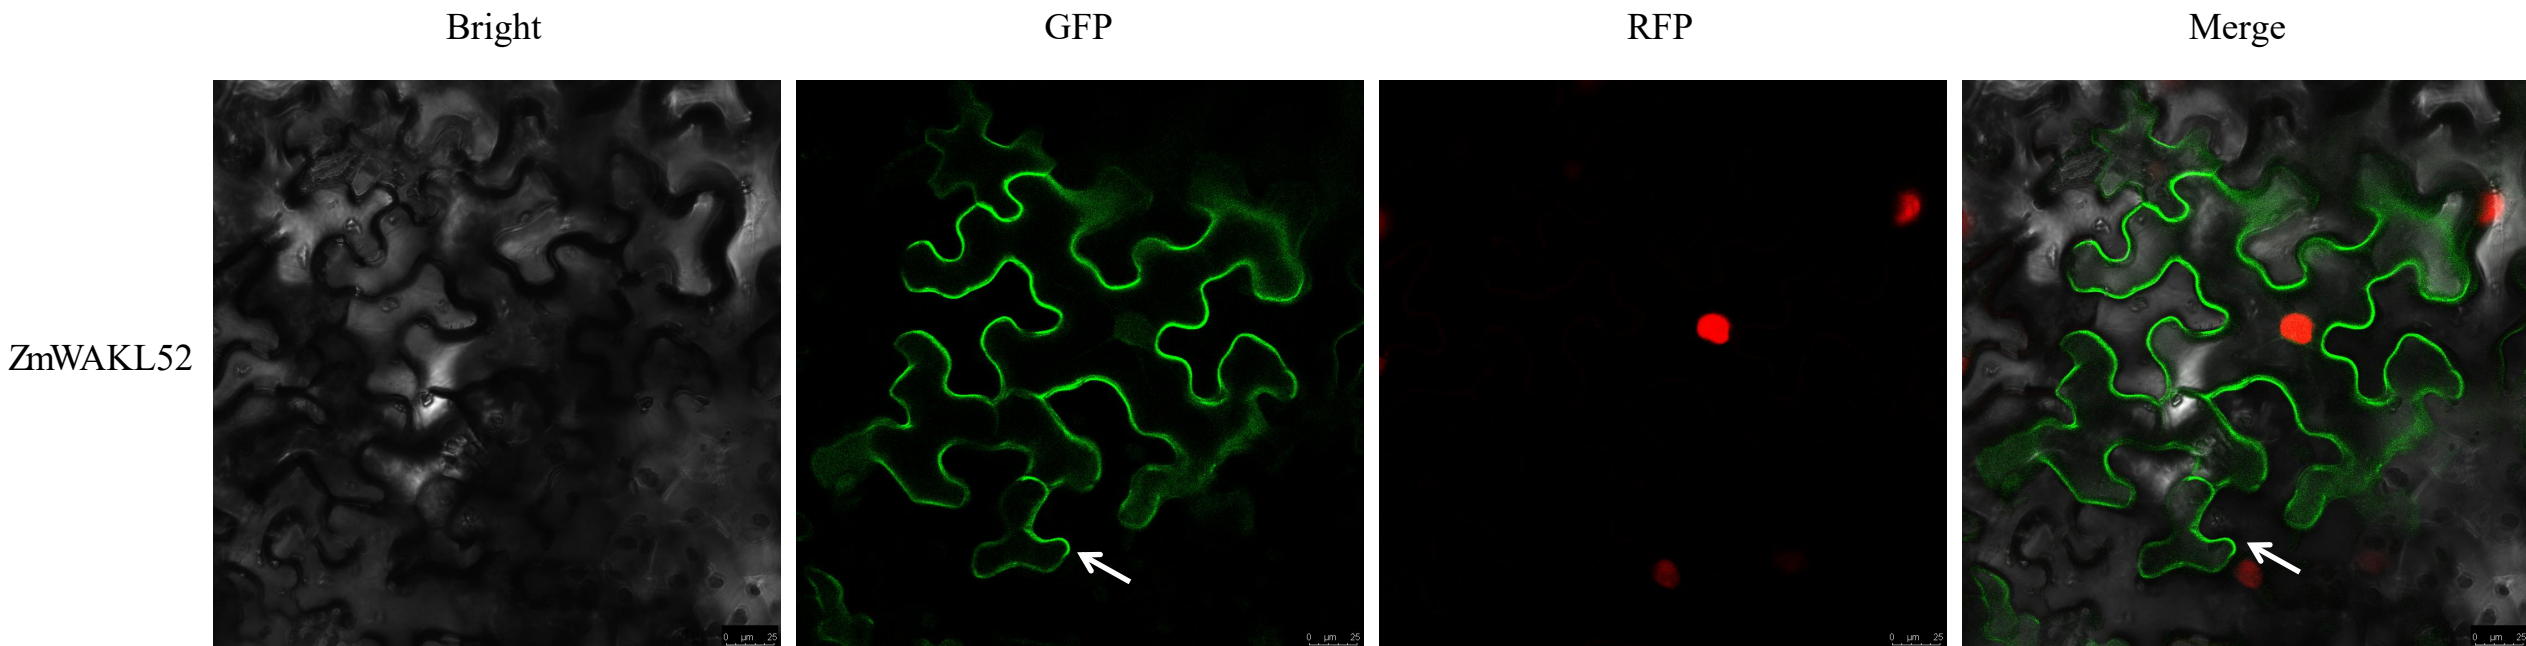

**Fig.S3** Subcellular localization analysis of ZmWAKL52 conducted in *N. benthamiana* leaves. NLS-RFP were used as nuclear marker and show red fluorescence signals. The arrow indicates GFP signals present in cell wall. Scale bar = 25  $\mu$ m.
